# Supplementary material
Source: Springer Nature journal article supplement (https://www.springermedizin.de/resource/supplementary/13256_2010_1483_MOESM4_ESM.pdf/9647770)
Supplement: MOESM4 [file 9647770]

**Graph depicting achievement and maintenance of normal serum potassium, bicarbonate and urine pH in keeping with resolution of type 4 RTA**

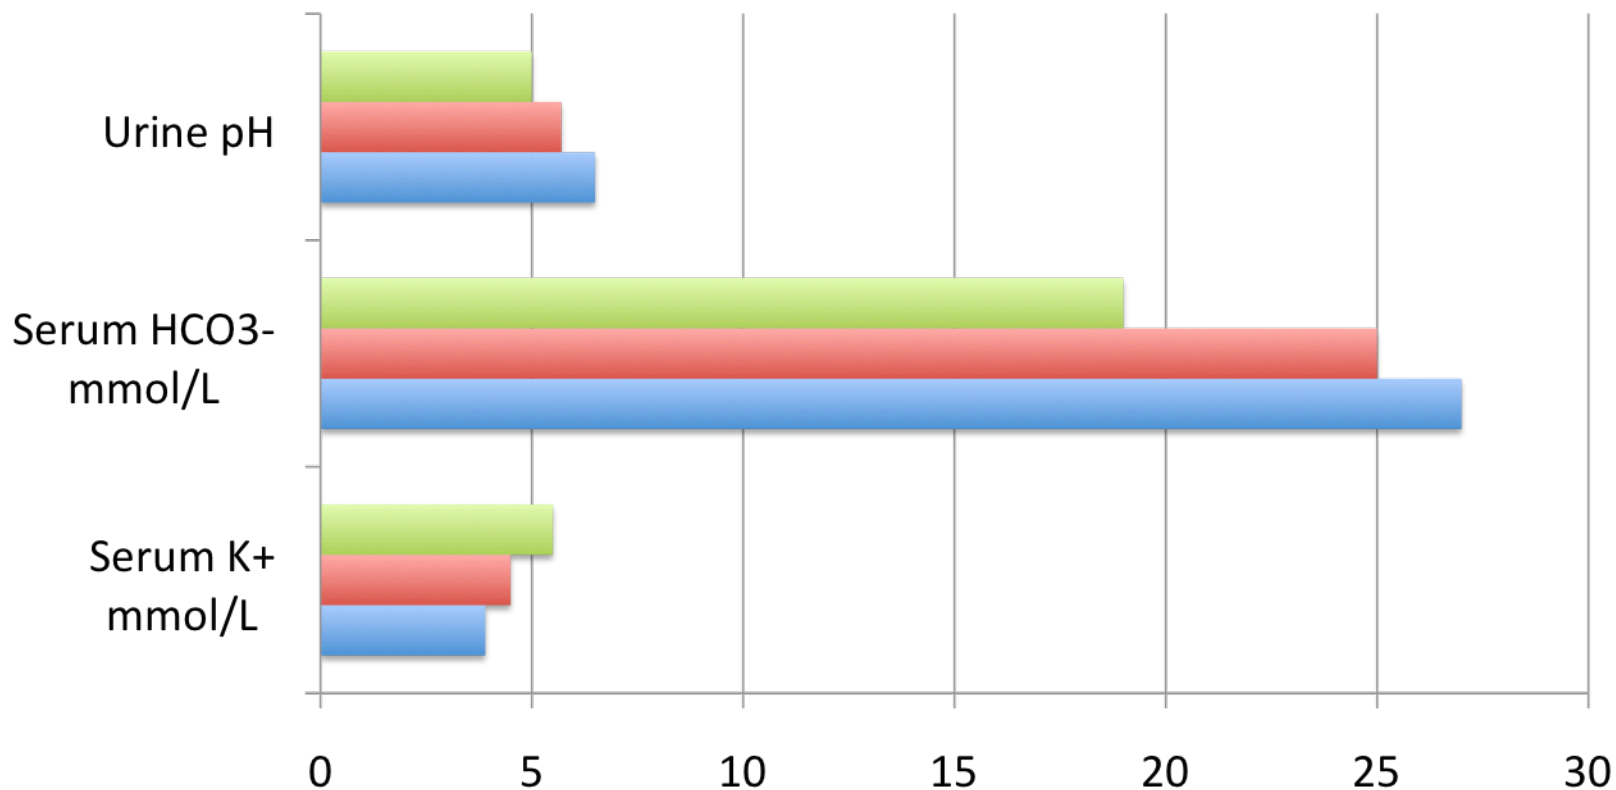

|                   | Serum K <sup>+</sup> mmol/L | Serum HCO <sub>3</sub> <sup>-</sup> mmol/L | Urine pH |
|-------------------|-----------------------------|--------------------------------------------|----------|
| DAY 5 ADMISSION   | 5.5                         | 19                                         | 5        |
| DAY 19 ADMISSION  | 4.5                         | 25                                         | 5.7      |
| 1 MONTH FOLLOW UP | 3.9                         | 27                                         | 6.5      |
